# Supplementary material for: Resin-supported cyclic telluride as a heterogeneous promoter of disulfide formation under solid–liquid biphasic conditions
Source: Royal Society of Chemistry journal article supplement (doi:10.1039/d3nj02646a), 2023-01-01
Supplement: d3nj02646a1.pdf [file d3nj02646a1.pdf]

*Supporting Information*

**Resin-supported cyclic telluride as a heterogeneous promoter of disulfide formation under solid–liquid biphasic conditions**

Yuya Nishizawa,<sup>a†</sup> Yuri Satoh,<sup>a†</sup> Osamu Kanie,<sup>b</sup> and Kenta Arai<sup>\*a,c</sup>

<sup>†</sup>These authors contributed equally to this study.

\* Corresponding author (k-arai4470@tokai-u.jp)

<sup>a</sup> Department of Chemistry, School of Science, Tokai University, Kitakaname, Hiratsuka-shi, Kanagawa 259-1292, Japan

<sup>b</sup> Department of Bioengineering, School of Engineering Kitakaname, Hiratsuka-shi, Kanagawa 259-1292, Japan

<sup>c</sup> Institute of Advanced Biosciences, Tokai University, Kitakaname, Hiratsuka-shi, Kanagawa 259-1292, Japan

**Contents**

|                                                                                                                                                                                                |       |
|------------------------------------------------------------------------------------------------------------------------------------------------------------------------------------------------|-------|
| <b>1. Experimental</b>                                                                                                                                                                         | ...2  |
| Synthesis of oxytocin                                                                                                                                                                          | ...2  |
| Preparation of reduced CX-397                                                                                                                                                                  | ...2  |
| <b>2. NMR spectra</b>                                                                                                                                                                          | ...4  |
| <b>3. Supplemental Data</b>                                                                                                                                                                    | ...12 |
| <b>Fig. S1</b> IR spectrum of <b>RSTe</b> .                                                                                                                                                    | ...12 |
| <b>Fig. S2</b> Quantitative analysis of telluride moiety on the resin.                                                                                                                         | ...13 |
| <b>Fig. S3</b> <sup>1</sup> H NMR spectra obtained from catalytic oxidation of 1-decanethiol ( <b>8a</b> ) under various conditions.                                                           | ...14 |
| <b>Table S1</b> Optimization of reaction conditions of SS-formation of oxytocin.                                                                                                               | ...15 |
| <b>Fig. S4</b> MALDI-TOF-MS chromatograms of AEMTS-blocked <b>10</b> , oxidized <b>10</b> , and dimerized state via SS bonds.                                                                  | ...16 |
| <b>Fig. S5</b> HPLC chromatograms obtained from SS-formation experiments of peptides <b>10</b> (a), <b>11</b> (b) and <b>12</b> (c) in the <i>absence</i> of <b>RST</b> . Reaction conditions. | ...17 |
| <b>Fig. S6</b> MALDI-TOF-MS chromatogram of fully oxidized <b>11</b> (2SS <sup>RlxA</sup> ).                                                                                                   | ...18 |
| <b>Fig. S7</b> HPLC chromatograms for SS-isomerization of CX397.                                                                                                                               | ...18 |
| <b>4. References</b>                                                                                                                                                                           | ...19 |

## 1. Experimental

### *Synthesis of oxytocin (10)*

The standard Fmoc-SPPS protocol using dicyclohexylcarbodiimide (DCC) as a condensing reagent was employed. Fmoc-Rink amide resin (109 mg, 0.05 mmol) was swelled with DMF for 16 h at 4 °C. After removing DMF, the resin was treated with 20% piperidine/DMF for 5 min with vortex mixing. After the deprotection reaction was further repeated with fresh 20% piperidine/DMF for 15 min, the resin was fully washed with DMF ( $\times 5$ ). Fmoc-Gly-OBt, which was prepared by mixing Fmoc-Gly-OH (64.9 mg, 0.2 mmol), 0.5 M HOBt/DMF (300  $\mu$ L), and 0.5 M DCC/DMF (300  $\mu$ L) for 30 min, was added to the resin. The mixture was vortexed for 60 min at 50 °C. After the coupling, the resin was washed with 50% MeOH/DCM ( $\times 3$ ). The reaction progression was monitored by a Kaiser test. The unreacted amino groups were acetylated by using 10% Ac<sub>2</sub>O and 5% DIEA in DMF for 5 min. Applying a similar protocol, the peptide chain was elongated on the resin, and the N-terminal Fmoc group was finally deprotected by 20% piperidine/DMF to yield H-Cys(Trt)-Tyr(*t*-Bu)-Ile-Gln(Trt)-Asn(Trt)-Cys(Trt)-Pro-Leu-Gly-NH-resin (187 mg). The obtained resin was fully washed with 50% MeOH/DCM ( $\times 1$ ) and DCM ( $\times 3$ ) and dried in vacuo. A portion of the obtained resin (100 mg, 27  $\mu$ mol) was treated with a TFA cocktail (trifluoroacetic acid (TFA) : H<sub>2</sub>O : triisopropylsilane (TIS) : 1,2-ethanedithiol (EDT) = 94 : 2.5 : 1.0 : 2.5, v/v/v/v, 4 mL), and the mixture was stirred for 3 h at room temperature. After the removal of TFA by N<sub>2</sub> stream, the deprotected peptide was precipitated with Et<sub>2</sub>O, washed with Et<sub>2</sub>O ( $\times 3$ ) and dried in vacuo. The resulting crude peptide was purified by using HPLC, which was equipped a 3 mL sample solution loop and a RP-column (ODS-HL  $\phi 10 \times 250$  mm [GL science, Tokyo, Japan]), at a flow rate of 4.7 mL/min. After injecting the sample solution, the ratio of eluent B was increased linearly from 15% to 35% in 0–20 min. The corrected fraction containing the target peptide (**10**) was lyophilized to yield **10** as a white powder (6.4  $\mu$ mol, 24%). MALDI-TOF-MS (*m/z*) found: 1009.67, calcd for [M+H]<sup>+</sup>: 1009.46. Peptide **10** was divided into small portions in micro-centrifuge tubes (2.0 mL capacity) so as to be 100 nmol per a tube and lyophilized. The resulting product was then used to SS-formation experiment using **RSTe** as described in Experimental (See the main text).

### *Preparation of reduced CX-397 (12)*

An excess amount of DTT<sup>red</sup> (18 mg) was added to a powder of CX397 (8 mg) dissolved in 100 mM Tris-HCl buffer solution containing 1 mM EDTA and 4 M guanidinium thiocyanate as a denaturant at pH 8.0 (600  $\mu$ L). After incubation at 25 °C for 60 min, the resulting fully reduced CX397 (**12**) was purified by passing through a column packed with Sephadex G25 resin, which was equilibrated with 0.1 M acetic acid. The collected fraction of R<sup>CX397</sup> was lyophilized to give a white

powder of **12**. The powder of **12** was redissolved in aqueous 0.1% TFA solution (4 mL), and the quantity of the protein in the solution was estimated by UV absorbance at 275 nm based on the molar extinction coefficient ( $\epsilon = 2960 \text{ M}^{-1} \text{ cm}^{-1} \text{ S}^1$ ). Compound **12** was divided into small portions in micro-centrifuge tubes (2.0 mL capacity) so as to be 80 nmol per tube and lyophilized. The resulting product was then used to SS-formation experiment using **RSTe** as described in Experimental (See the main text).

## 2. NMR spectra of disulfide compounds

### 9a: 1,2-Didecyl disulfide

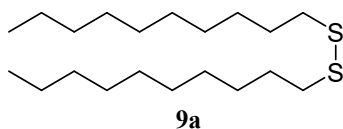

Using thiol **8a** (102.5 mg, 0.59 mmol) and **RSTe** (2.95  $\mu\text{mol}$  [0.5 mol%]), disulfide **9a** was obtained as a colorless oil. Yield: 102 mg (quant.) using  $\text{CHCl}_3$  as a solvent, respectively;  $^1\text{H}$  NMR ( $\text{CDCl}_3$ ):  $\delta$  = 2.70 (t,  $J$  = 7.3 Hz, 4H), 1.72–1.66 (m, 4H), 1.43–1.37 (m, 4H), 1.35–1.26 (m, 24H), 0.90 ppm (t,  $J$  = 6.9 Hz, 6H);  $^{13}\text{C}$  NMR ( $\text{CDCl}_3$ ):  $\delta$  = 39.23, 31.91, 29.58, 29.54, 29.33, 29.27, 29.25, 28.55, 22.69, 14.11 ppm. Spectroscopic data is in accordance with our previous report.<sup>S2</sup>

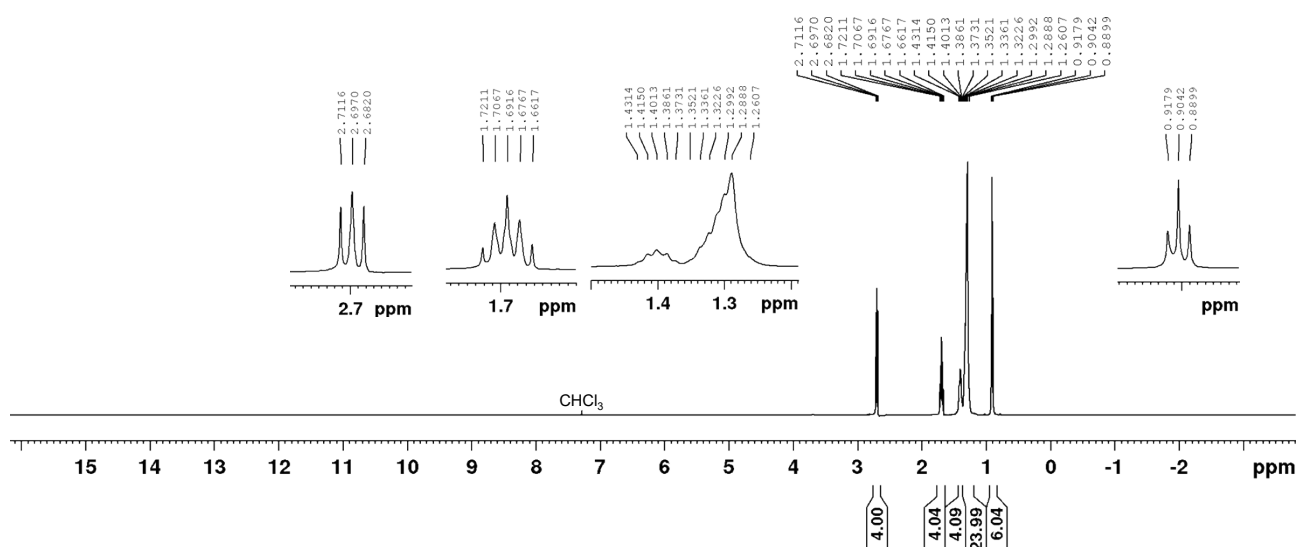

### 9b: 1,2-Dicyclohexyl disulfide

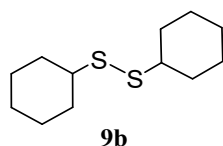

Using thiol **8b** (62.7 mg, 0.54 mmol) and **RSTe** (2.70  $\mu\text{mol}$  [0.5 mol%]), disulfide **9a** was obtained as a colorless oil. Yield: 60.5 mg (97%);  $^1\text{H}$  NMR ( $\text{CDCl}_3$ ):  $\delta$  = 2.73–2.67 (m, 2H), 2.07–2.02 (m, 4H), 1.83–1.79 (m, 4H), 1.65–1.61 (m, 2H), 1.37–1.20 ppm (m, 10H). Spectroscopic data is in accordance with our previous report.<sup>S2</sup>

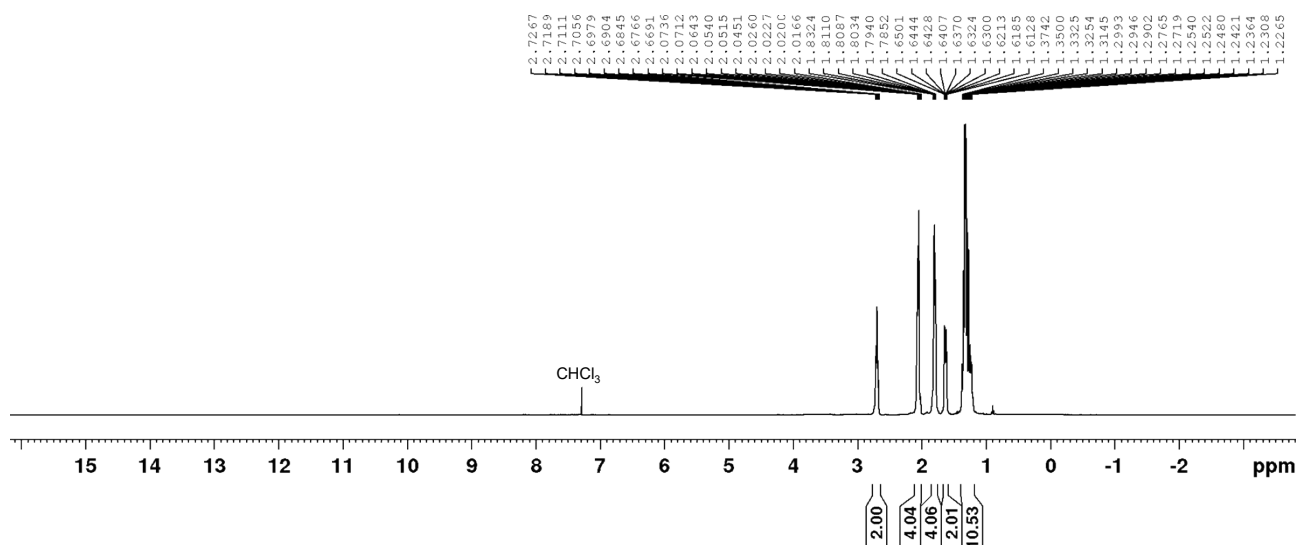

**9c: 1,2-Dibenzyl disulfide**

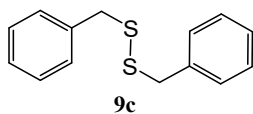

Using thiol **8c** (70.8 mg, 0.57 mmol) and **RSTe** (2.85  $\mu\text{mol}$  [0.5 mol%]), disulfide **9c** was obtained as a white solid. Yield: 66.3 mg (94%);  $^1\text{H}$  NMR ( $\text{CDCl}_3$ ):  $\delta$  = 7.42–7.31 (m, 10H), 3.68 ppm (s, 4H). Spectroscopic data is in accordance with our previous report.<sup>S2</sup>

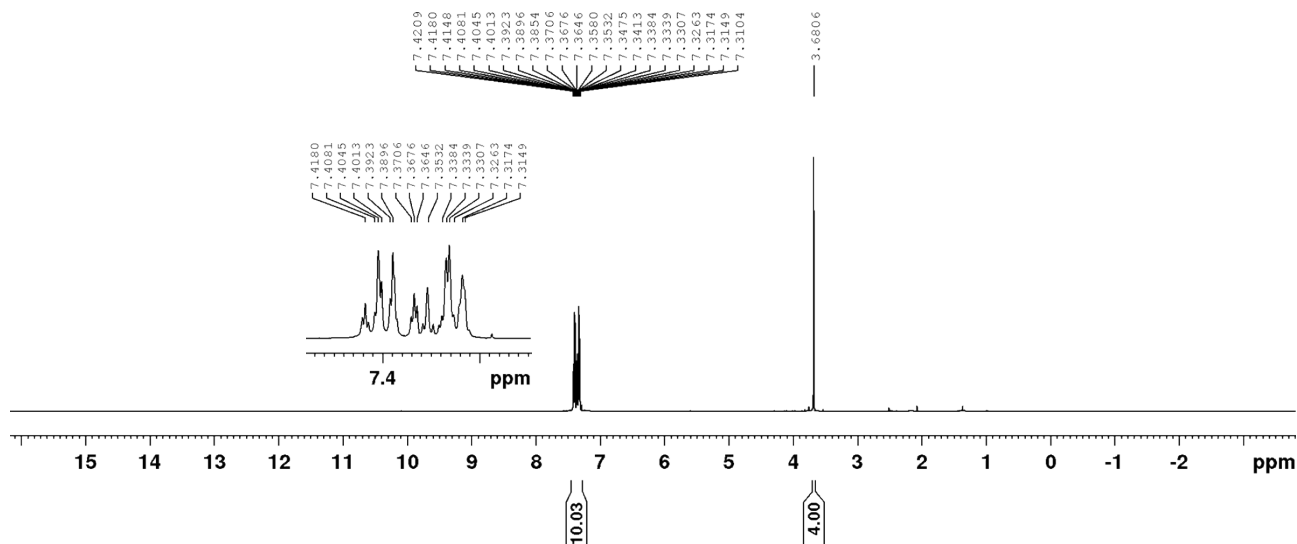

**9d: 1,2-Diphenyl disulfide**

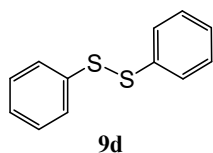

Using thiol **8d** (59.5 mg, 0.54 mmol) and **RSTe** (2.70  $\mu\text{mol}$  [0.5 mol%]), disulfide **9d** was obtained as a white solid. Yield: 59.0 mg (quant.);  $^1\text{H}$  NMR ( $\text{CDCl}_3$ ):  $\delta$  = 7.54 (d,  $J$  = 7.6 Hz, 4H), 7.34 (t,  $J$  = 7.5 Hz, 4H), 7.28–7.25 ppm (m, 2H). Spectroscopic data is in accordance with our previous report.<sup>S2</sup>

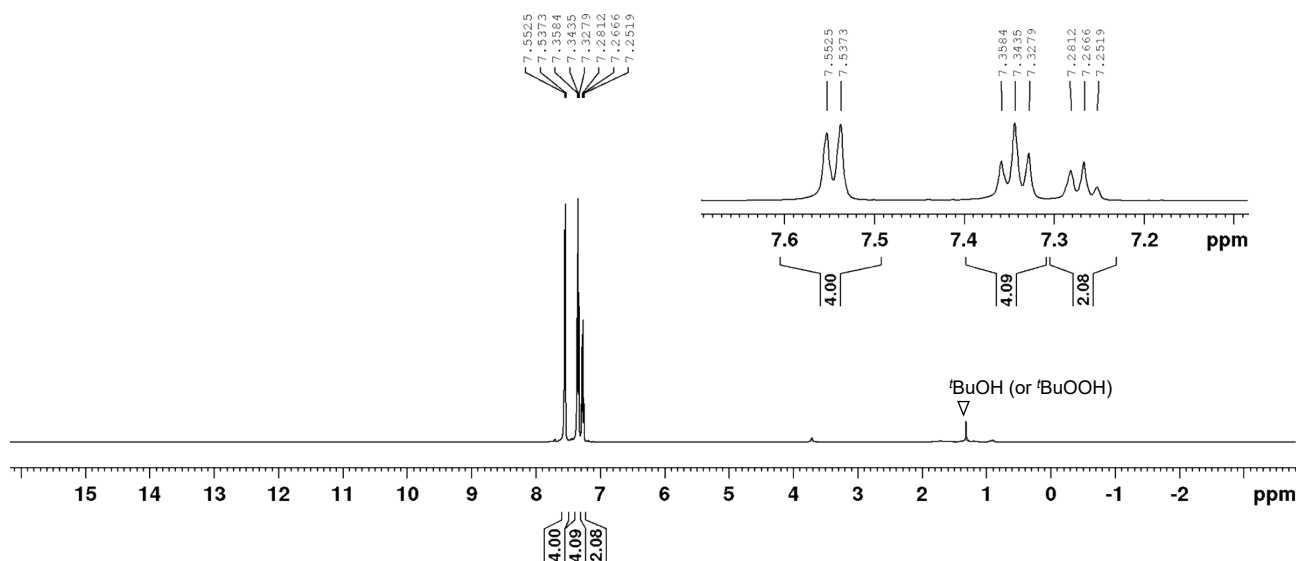

**9e:** Bis(4-methylphenyl) disulfide

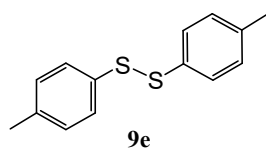

Using thiol **8e** (67.1 mg, 0.54 mmol) and **RSTe** (2.70  $\mu$ mol [0.5 mol%]), disulfide **9e** was obtained as a white solid. Yield: 66.2 mg (99%);  $^1\text{H}$  NMR ( $\text{CDCl}_3$ ):  $\delta$  = 7.45–7.43 (m, 4H), 7.15 (d,  $J$  = 8.1 Hz, 4H), 2.37 ppm (s, 6H). Spectroscopic data is in accordance with our previous report.<sup>S2</sup>

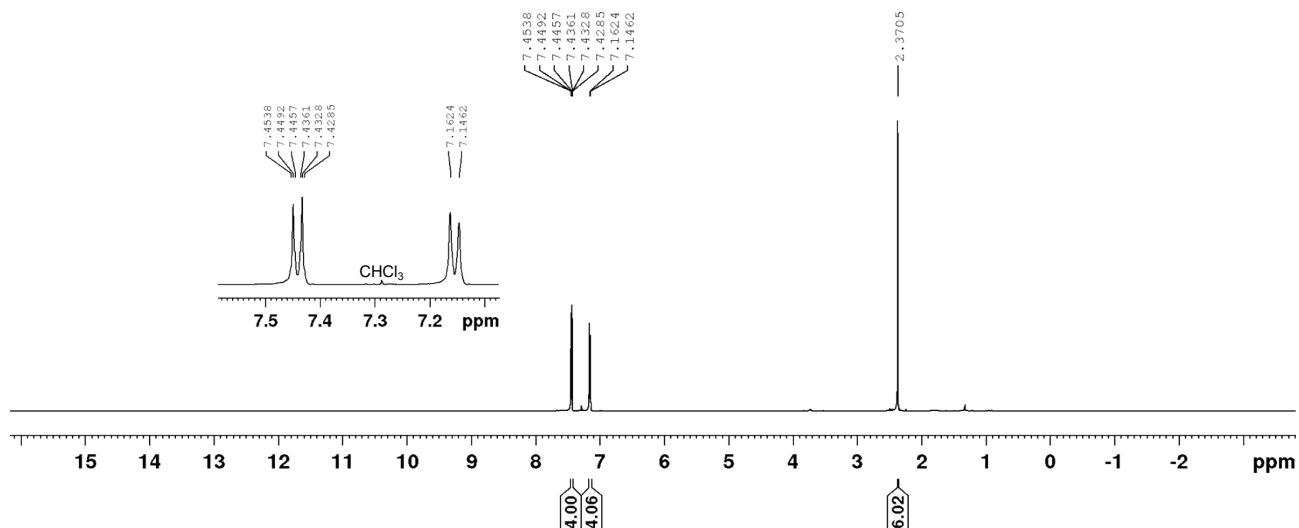

**9f:** 1,2-Bis(4-(*tert*-butyl)phenyl) disulfide

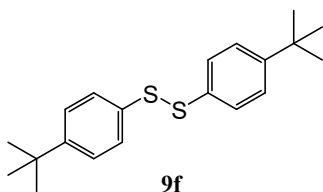

Using thiol **8f** (73.1 mg, 0.44 mmol) and **RSTe** (2.20  $\mu$ mol [0.5 mol%]), disulfide **9f** was obtained as a white solid. Yield: 73.4 mg (quant.);  $^1\text{H}$  NMR ( $\text{CDCl}_3$ ):  $\delta$  = 7.54–7.51 (m, 4H), 7.42–7.39 (m, 4H), 1.38 ppm (m, 18H). Spectroscopic data is in accordance with our previous report.<sup>S2</sup>

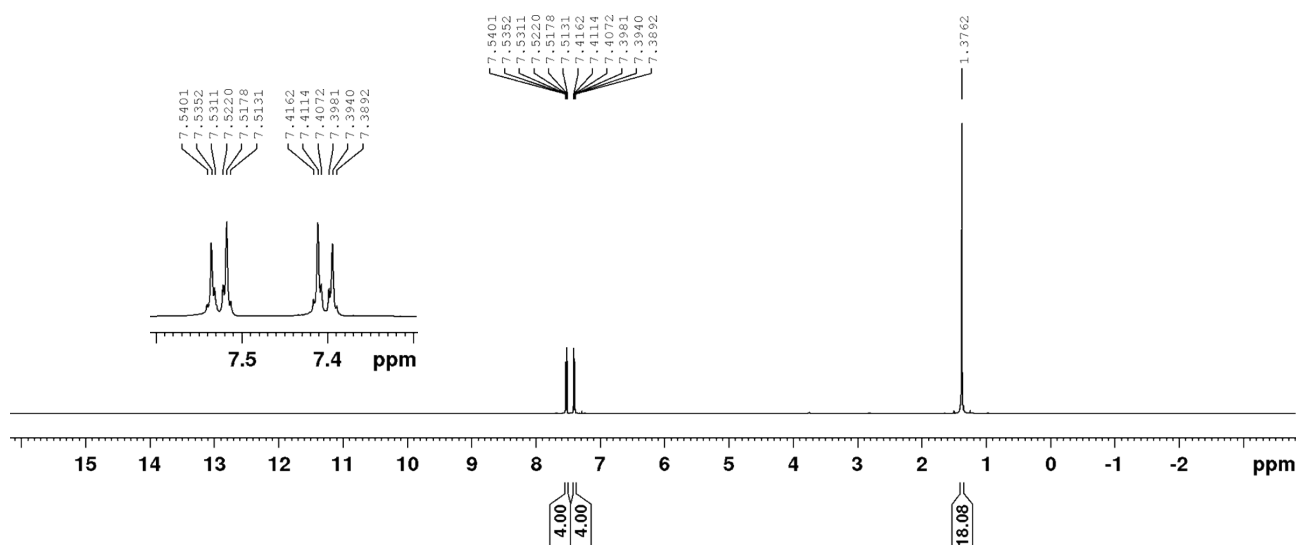

**9g:** Bis(4-methoxyphenyl) disulfide

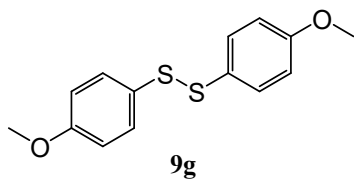

Using thiol **8g** (52.2 mg, 0.37 mmol) and **RSTe** (1.85  $\mu$ mol [0.5 mol%]), disulfide **9g** was obtained as an off-white solid. Yield: 49.4 mg (96%);  $^1\text{H}$  NMR ( $\text{CDCl}_3$ ):  $\delta$  = 7.45–7.42 (m, 4H), 6.88–6.85 (m, 4H), 3.82 ppm (s, 6H). Spectroscopic data is in accordance with our previous report.<sup>S2</sup>

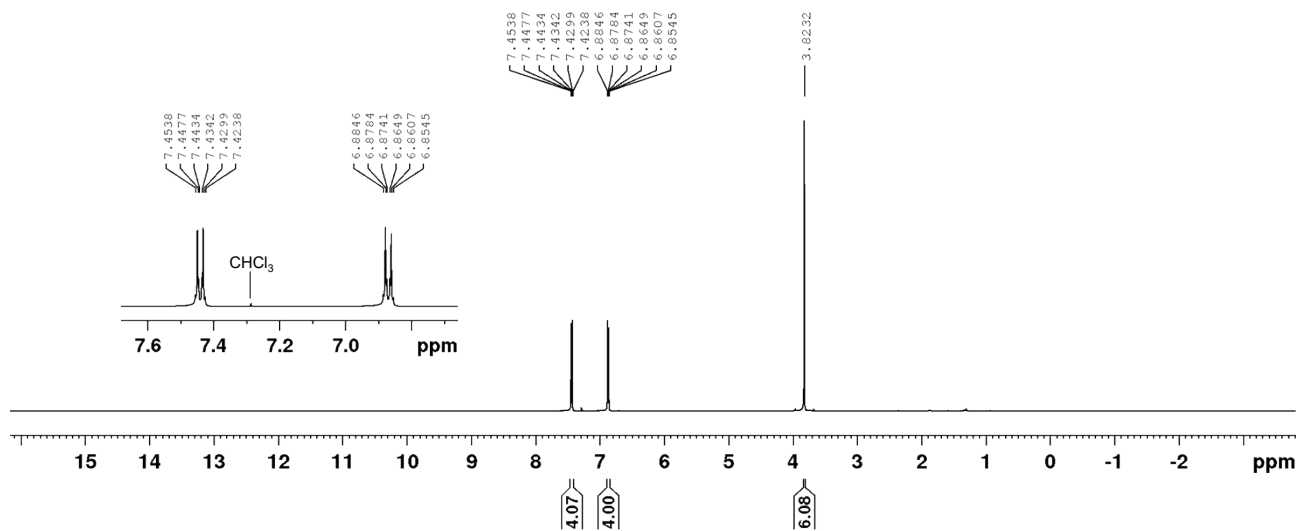

**9h:** Bis(4-fluorophenyl) disulfide

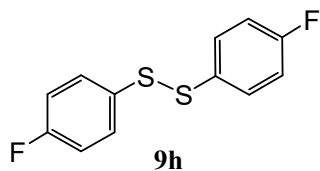

Using thiol **8h** (69.2 mg, 0.54 mmol) and **RSTe** (2.70  $\mu$ mol [0.5 mol%]), disulfide **9h** was obtained as an off-white solid. Yield: 60.8 mg (89%);  $^1\text{H}$  NMR ( $\text{CDCl}_3$ ):  $\delta$  = 7.47 (dd,  $J$  = 5.15, 8.80 Hz, 4H), 7.04 ppm (t,  $J$  = 17.3 Hz, 4H). Spectroscopic data is in accordance with our previous report.<sup>S2</sup>

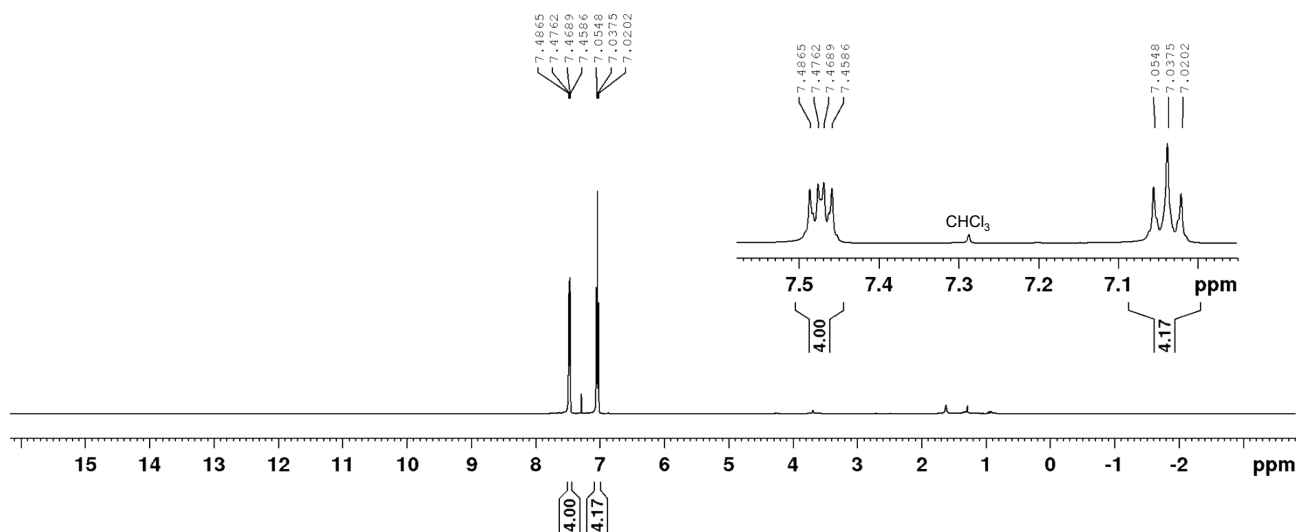

**9i:** *Bis(4-chlorophenyl) disulfide*

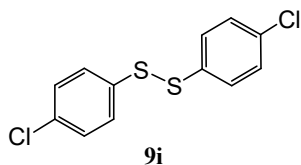

Using thiol **8i** (79.0 mg, 0.54 mmol) and **RSTe** (2.70  $\mu$ mol [0.5 mol%]), disulfide **9i** was obtained as a white solid. Yield: 68.8 mg (89%);  $^1\text{H}$  NMR ( $\text{CDCl}_3$ ):  $\delta$  = 7.44–7.42 (m, 4H), 7.32–7.29 ppm (m, 4H). Spectroscopic data is in accordance with our previous report.<sup>S2</sup>

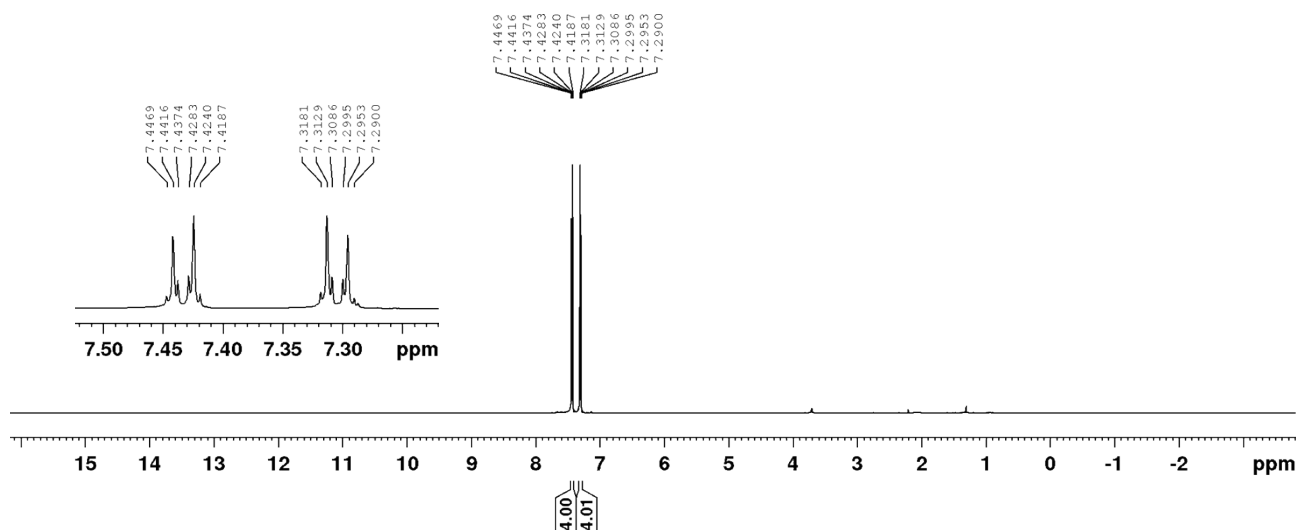

**9j:** *Bis(4-bromophenyl) disulfide*

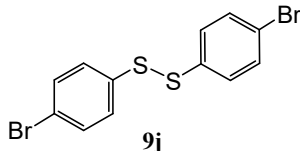

Using thiol **8j** (103.8 mg, 0.55 mmol) and **RSTe** (2.75  $\mu$ mol [0.5 mol%]), disulfide **9j** was obtained as a white solid. Yield: 88.9 mg (86%);  $^1\text{H}$  NMR ( $\text{CDCl}_3$ ):  $\delta$  = 7.36–7.34 (m, 4H), 7.27–7.25 ppm (m, 4H). Spectroscopic data is in accordance with our previous report.<sup>S2</sup>

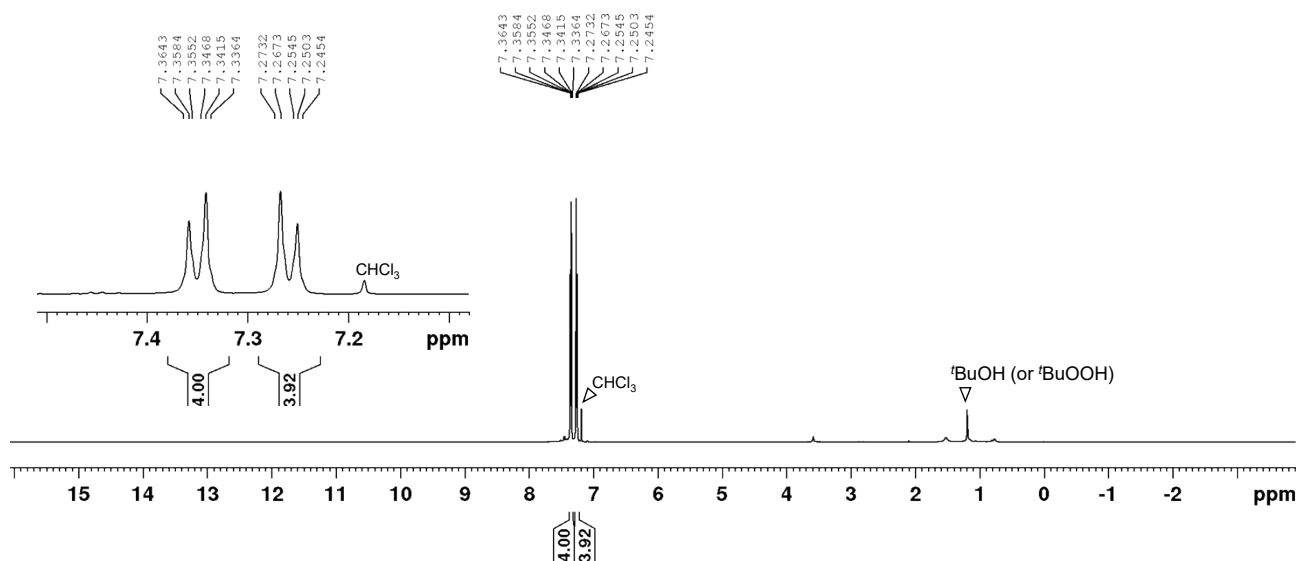

**9k:** *N*-Acetyl-*L*-cystine methyl ester

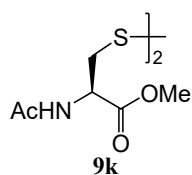

Using thiol **8k** (5.6 mg, 0.032 mmol) and **RSTe** (0.32  $\mu$ mol [1.0 mol%]), disulfide **9k** was obtained as a white solid. Yield: 5.3 mg (95%); <sup>1</sup>H NMR (CDCl<sub>3</sub>):  $\delta$  = 6.49 (d, *J* = 7.2 Hz, 2H), 4.82–4.79 (m, 2H), 3.71 (s, 6H), 3.18–3.10 (m, 4H), 2.00 ppm (s, 6H). Spectroscopic data is in accordance with our previous report.<sup>S2</sup>

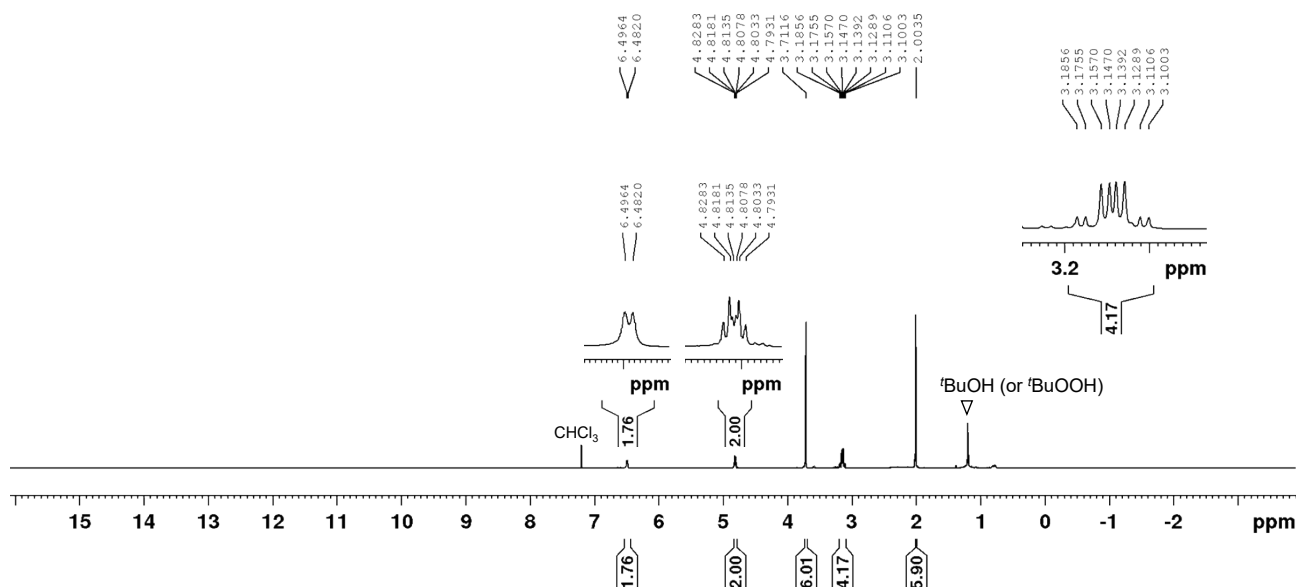

**9l:** *N*-(*tert*-Butoxycarbonyl)-*L*-cystine methyl ester

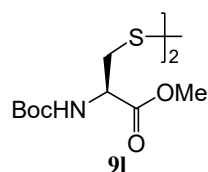

Using thiol **8l** (35.6 mg, 0.15 mmol) and **RSTe** (0.75  $\mu$ mol [0.5 mol%]), disulfide **9l** was obtained as a white solid. Yield: 35.1 mg (quant.); <sup>1</sup>H NMR (CDCl<sub>3</sub>):  $\delta$  = 5.36 (d, *J* = 8.7, 2H),  $\delta$  = 4.54 (q, *J* = 7.2, 2H), 3.70 (s, 6H), 3.10–3.09 (m, 4H), 1.38 (s, 18H) ppm. Spectroscopic data is in accordance with our previous report.<sup>S2</sup>

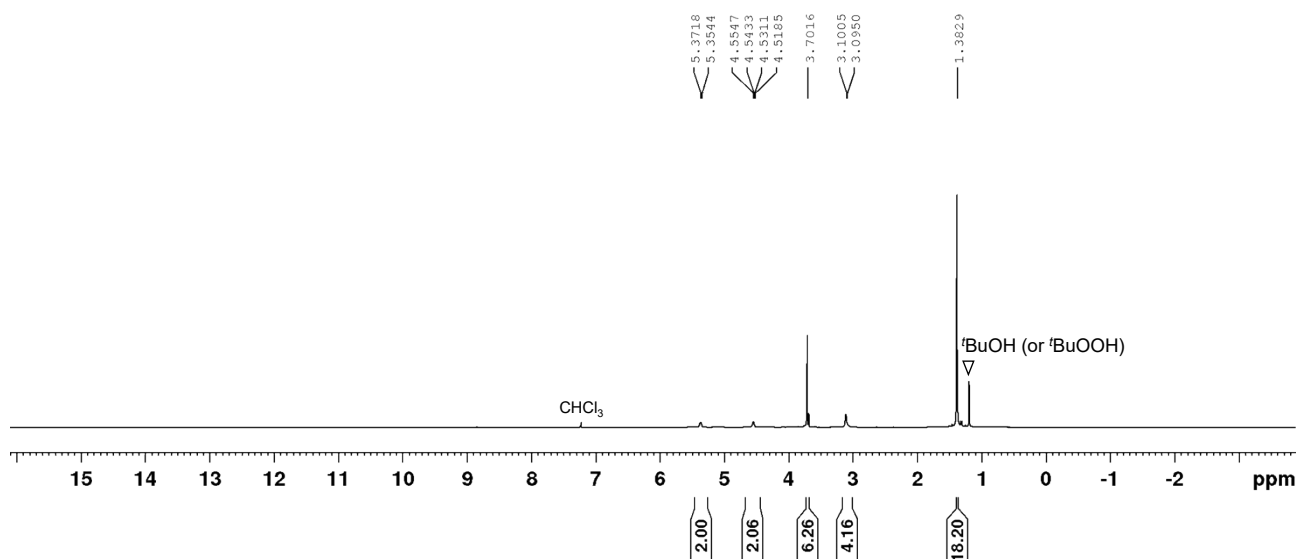

**9m: Cystamine dihydrochloride**

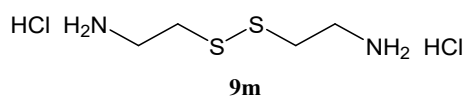

Using thiol **8m** (76.2 mg, 0.67 mmol) and **RSTe** (3.25  $\mu$ mol [0.5 mol%]), disulfide **9m** was obtained as a white powder. Yield: 75.4 mg (quant);  $^1\text{H}$  NMR ( $\text{D}_2\text{O}$ ):  $\delta$  = 3.32 (t,  $J$  = 6.5 Hz, 4H), 2.94 ppm (t,  $J$  = 6.5 Hz, 4H);  $^{13}\text{C}$  NMR ( $\text{D}_2\text{O}$ ):  $\delta$  = 37.83, 33.37 ppm. Spectroscopic data is in accordance with our previous report.<sup>S2</sup>

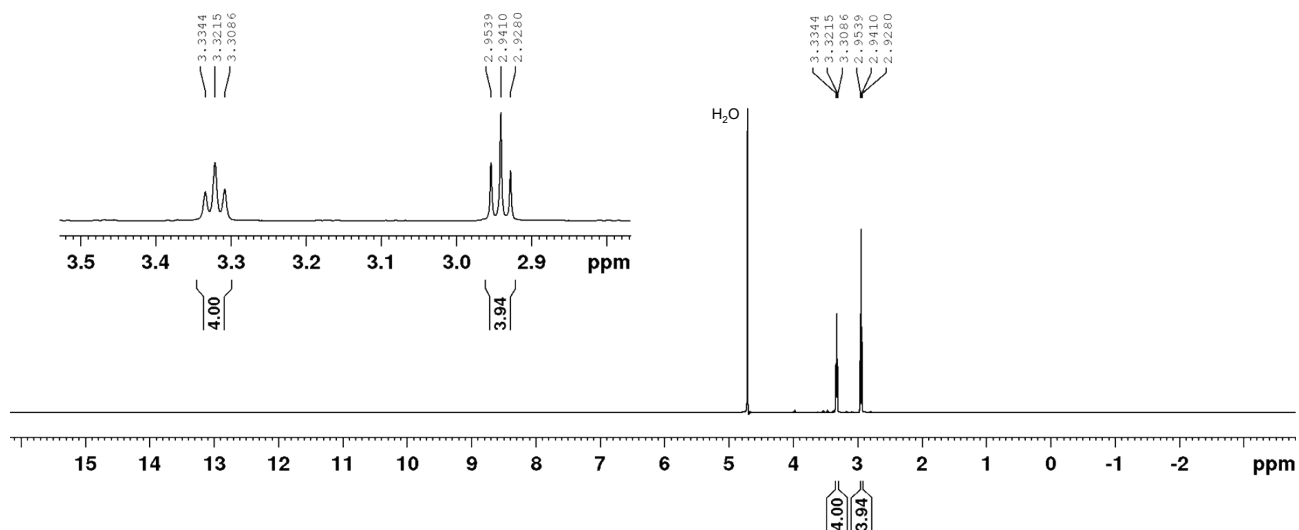

**9n: Oxidized glutathione (GSSG)**

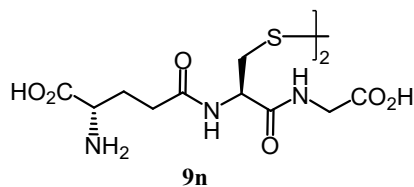

Using thiol **8n** (172.7 mg, 0.56 mmol) and **RSTe** (2.80  $\mu$ mol [0.5 mol%]), disulfide **9n** was obtained as a white powder. Yield: 172.7 mg (quant.);  $^1\text{H}$  NMR ( $\text{D}_2\text{O}$ ):  $\delta$  = 4.59 (dd,  $J$  = 4.65, 9.35 Hz, 2H), 3.86–3.79 (m, 4H), 3.70 ppm (t,  $J$  = 6.4 Hz, 2H), 3.12 ppm (dd,  $J$  = 4.8, 14.2 Hz, 2H), 2.83 ppm (dd,  $J$  = 9.4, 14.2 Hz, 2H), 2.45–2.34 ppm (m, 4H), 2.02 ppm (q,  $J$  = 8.7 Hz, 4H). Spectroscopic data is in accordance with our previous report.<sup>S2</sup>

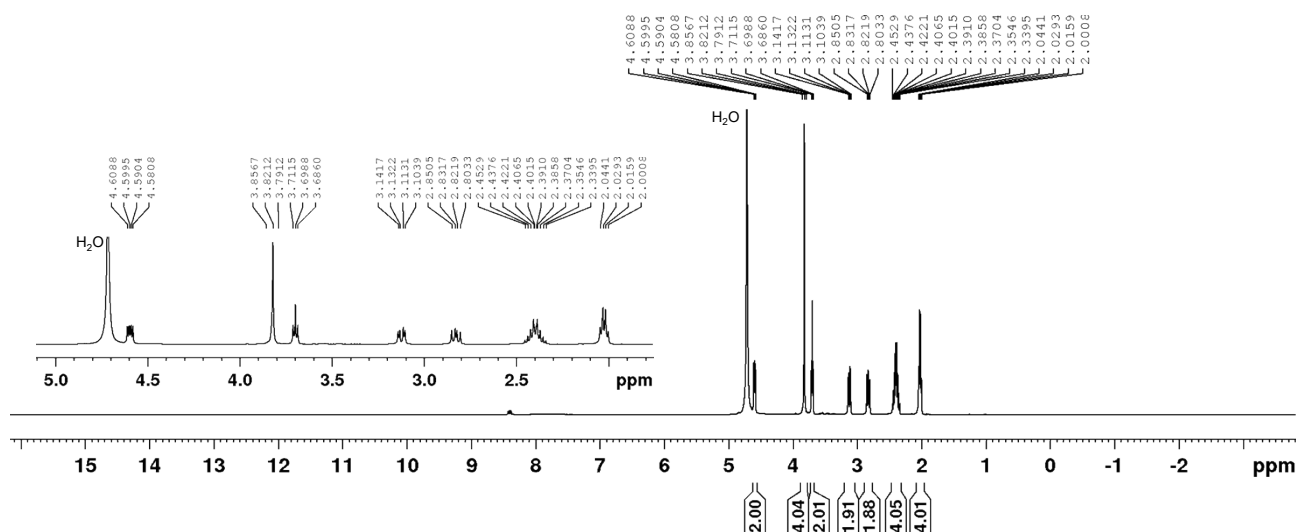

**6l:** *trans*-4,5-Dihydroxy-1,2-dithiane (*DTT<sup>ox</sup>*)

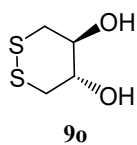

Using thiol **8o** (8.3 mg, 0.054 mmol) and **RSTe** (0.27  $\mu$ mol [5 mol%]), disulfide **9o** was obtained as a white powder. Yield: 8.2 mg (quant.);  $^1\text{H}$  NMR ( $\text{D}_2\text{O}$ ):  $\delta$  = 3.57–3.56 (m, 2H), 3.06–3.04 (m, 2H), 2.87–2.83 (m, 2H). The obtained spectral data agreed well with that of commercial sample.

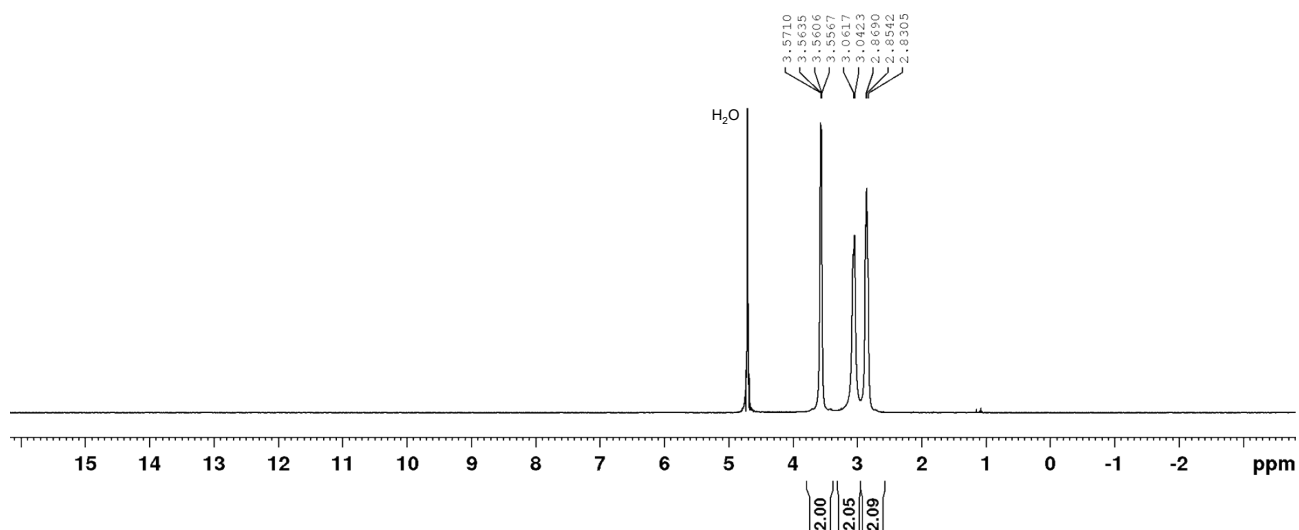

### 3. Supplemental data

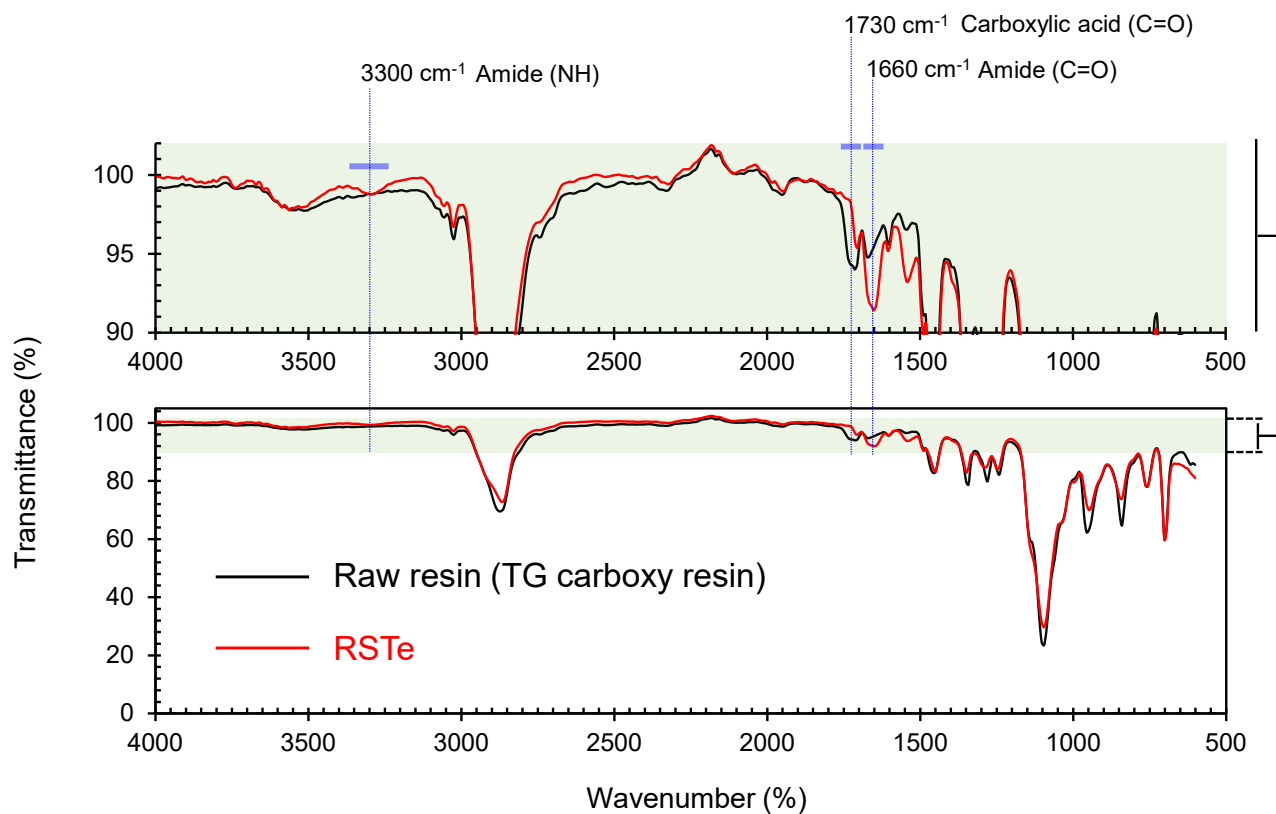

**Fig. S1** Attenuated total reflectance (ATR)-fourier transformed infrared spectroscopic (ATR-FTIR) analysis. Black and red lines refer to raw resin (NovaSyn® TG carboxy resin) having no telluride moiety and **RSTe**, respectively.

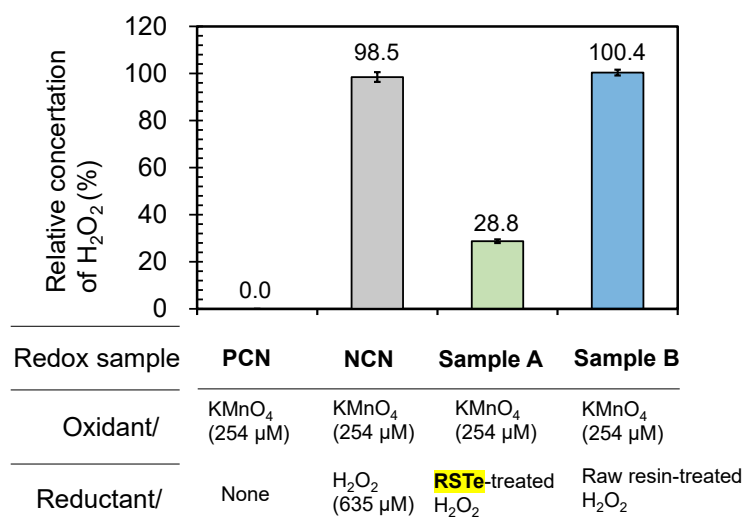

**Fig. S2** Quantitative analysis of H<sub>2</sub>O<sub>2</sub> in water after treatment with **RSTe** or a raw resin (TG-carboxy<sup>®</sup>). The concentration of remained H<sub>2</sub>O<sub>2</sub> was estimated by stoichiometric relationship in the redox reaction between H<sub>2</sub>O<sub>2</sub> and KMnO<sub>4</sub>. See **Note** for the experimental details described below.

**Note:** To estimate the modification rate of the resin decorated with telluride **4**, the reduction of H<sub>2</sub>O<sub>2</sub> by **RSTe** according to eq. 1 was performed, and the concentration of remained H<sub>2</sub>O<sub>2</sub> after the reaction was determined by H<sub>2</sub>O<sub>2</sub>-KMnO<sub>4</sub> redox titration. Initially, H<sub>2</sub>O<sub>2</sub> (0.81 μmol) and **RSTe** or raw-resin (TG-carboxy resin<sup>®</sup>) (0.81 μmol as substituent on the resin) were mixed in 600 μL of water at 37 °C with vigorous mixing for 3 h.

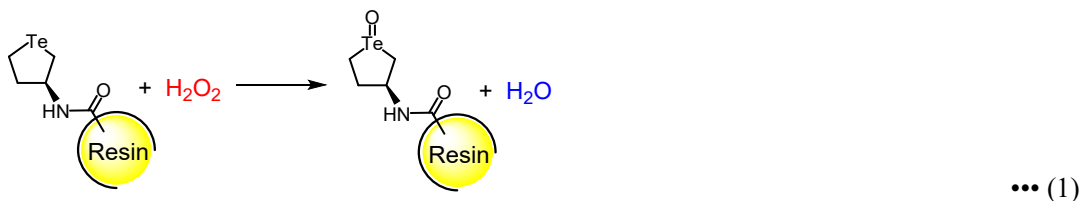

Subsequently, based on eq. 2, H<sub>2</sub>O<sub>2</sub> remaining in the reaction solution was oxidized by KMnO<sub>4</sub> in the presence of sulfuric acid.

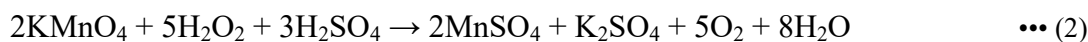

The reaction mixture obtained after the reaction (eq. 1) was centrifuged at 6000 rpm for 30 sec. Then, 400 μL of the supernatant containing up to 540 nmol H<sub>2</sub>O<sub>2</sub> was taken up, mixed with 400 μL of aqueous solution containing 216 nmol KMnO<sub>4</sub> and 100 μL of 4 M H<sub>2</sub>SO<sub>4</sub>, and allowed to react for 2 min at room temperature. The concentration of unreacted KMnO<sub>4</sub> in the resulting solution was determined on the basis of the absorbance at 525 nm, from which the concentration of unreacted H<sub>2</sub>O<sub>2</sub> in the reaction of eq. 1 was estimated.

The result indicated that 71% of H<sub>2</sub>O<sub>2</sub> was converted to H<sub>2</sub>O during the reaction for eq. 1, suggesting that TG-carboxy resin<sup>®</sup> was modified with telluride **4** in up to 71%.

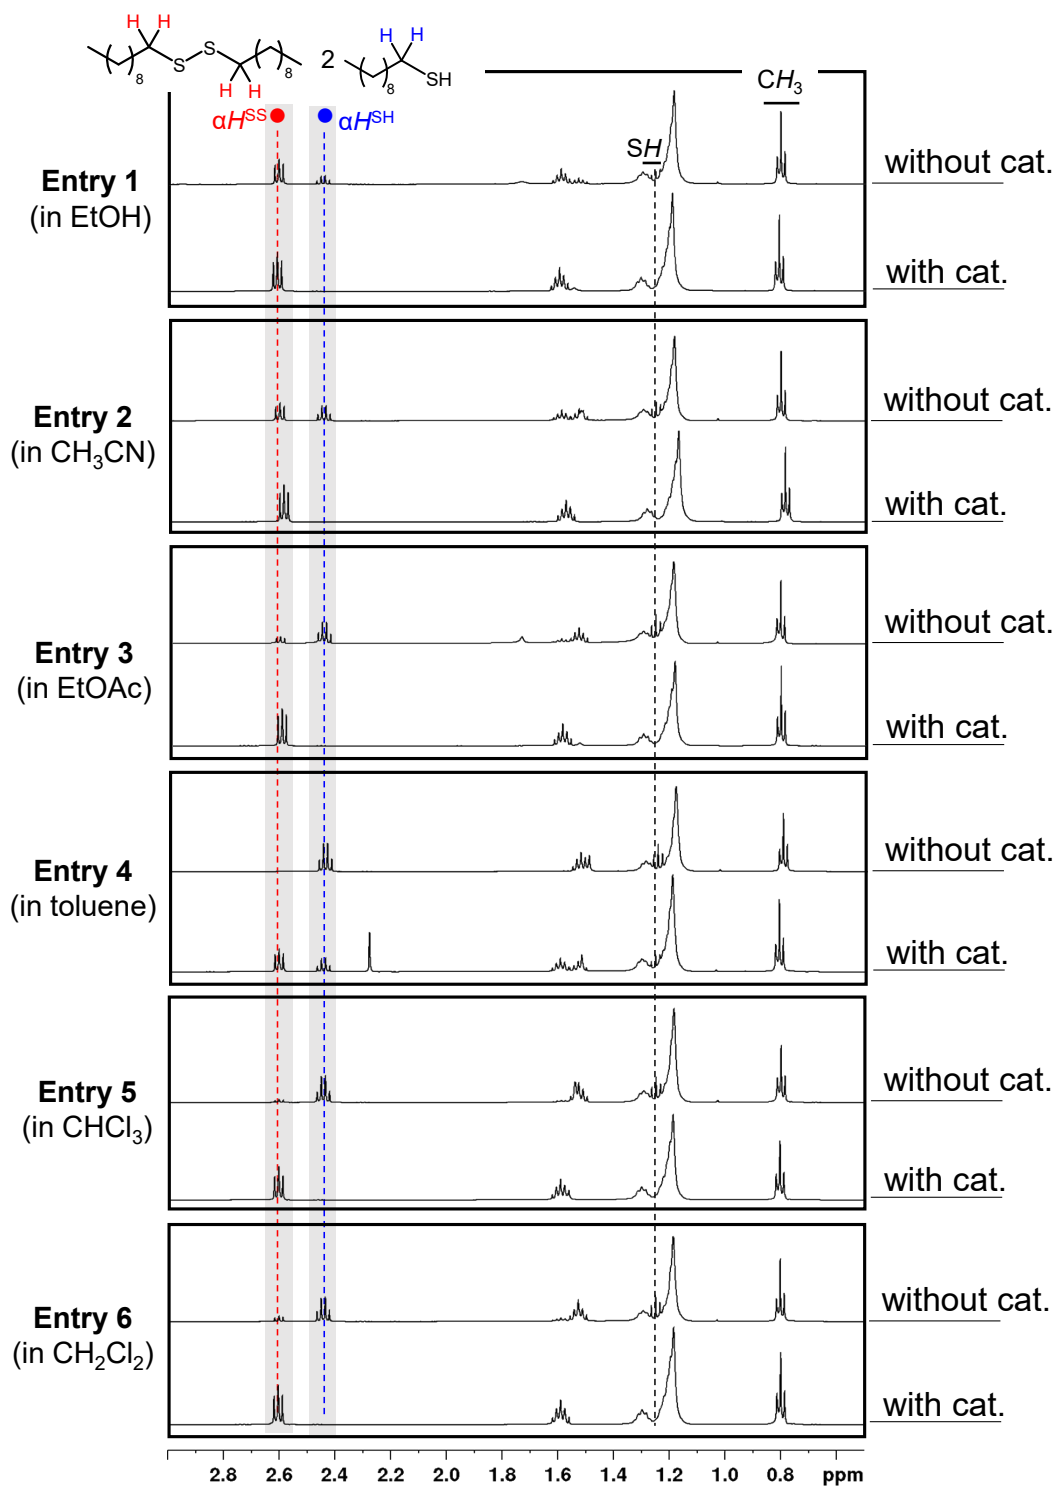

**Fig. S3**  $^1\text{H}$  NMR spectra obtained from catalytic oxidation of 1-decanethiol (**8a**) under various conditions. Entry numbers correspond to those of Table 1 in the main text.

**Table S1** Optimization of reaction conditions for SS-formation of oxytocin.

| $  \begin{array}{ccc}  \begin{array}{c} \text{SH} \quad \text{HS} \\   \quad   \\ \text{H}-\text{C}^{\text{Y}}\text{IQN}\text{C}^{\text{Y}}\text{PLG-NH}_2 \\ \mathbf{10} \text{ (100 nmol)} \end{array} & \xrightarrow[25\text{ }^\circ\text{C}]{\begin{array}{c} \text{H}_2\text{O}_2 \\ \mathbf{RSTe} \end{array}} & \begin{array}{c} \text{S} \quad \text{S} \\   \quad   \\ \text{H}-\text{C}^{\text{Y}}\text{IQN}\text{C}^{\text{Y}}\text{PLG-NH}_2 \\ \text{Oxidized } \mathbf{10} \end{array}  \end{array}  $ |             |                                      |                   |                                 |                           |                                    |                                    |
|-----------------------------------------------------------------------------------------------------------------------------------------------------------------------------------------------------------------------------------------------------------------------------------------------------------------------------------------------------------------------------------------------------------------------------------------------------------------------------------------------------------------------|-------------|--------------------------------------|-------------------|---------------------------------|---------------------------|------------------------------------|------------------------------------|
| Entry                                                                                                                                                                                                                                                                                                                                                                                                                                                                                                                 | RSTe (nmol) | H <sub>2</sub> O <sub>2</sub> (nmol) | Reaction time (h) | Solvent (Vol. = 1 mL)           | Products                  |                                    |                                    |
|                                                                                                                                                                                                                                                                                                                                                                                                                                                                                                                       |             |                                      |                   |                                 | <b>7</b> (%) <sup>a</sup> | Oxidized <b>7</b> (%) <sup>a</sup> | Byproduct [Dimer] (%) <sup>a</sup> |
| 1                                                                                                                                                                                                                                                                                                                                                                                                                                                                                                                     | 100         | 100                                  | 1                 | 0.1%TFA/H <sub>2</sub> O        | 48                        | 50                                 | 2                                  |
| 2                                                                                                                                                                                                                                                                                                                                                                                                                                                                                                                     | 100         | 150                                  | 23                | MeCN:H <sub>2</sub> O [1:3 v:v] | 0                         | 96                                 | 4                                  |
| 3                                                                                                                                                                                                                                                                                                                                                                                                                                                                                                                     | 100         | 150                                  | 4                 | 0.1%TFA/H <sub>2</sub> O        | 26                        | 74                                 | 0                                  |
| 4                                                                                                                                                                                                                                                                                                                                                                                                                                                                                                                     | 100         | 190                                  | 4.5               | 0.1% TFA/H <sub>2</sub> O       | 4                         | 92                                 | 4                                  |
| 5                                                                                                                                                                                                                                                                                                                                                                                                                                                                                                                     | 100         | 210                                  | 2                 | 0.1%TFA/H <sub>2</sub> O        | 0                         | 96                                 | 4                                  |
| 6                                                                                                                                                                                                                                                                                                                                                                                                                                                                                                                     | 150         | 210                                  | 1                 | 0.1%TFA/H <sub>2</sub> O        | 0                         | 91                                 | 9                                  |
| 7                                                                                                                                                                                                                                                                                                                                                                                                                                                                                                                     | None        | 210                                  | 2                 | 0.1%TFA/H <sub>2</sub> O        | 99                        | 1                                  | 0                                  |

<sup>a</sup> Ratio estimated from sum of the peak areas for products and the starting material (**10**) on the HPLC chromatogram.

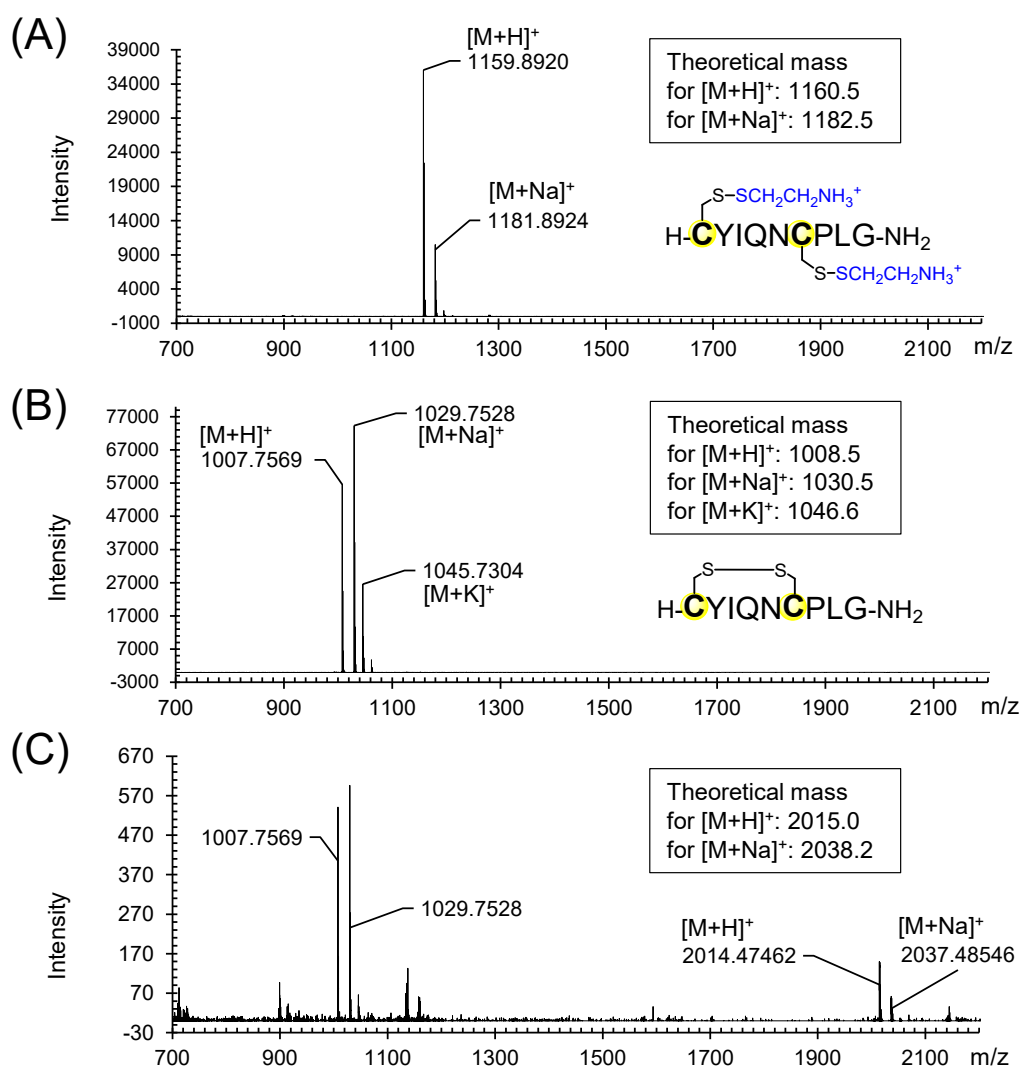

**Fig. S4** MALDI-TOF-MS chromatograms of AEMTS-blocked **10** (A), oxidized **10** (B), and dimerized state via SS-bonds (C). Each product was isolated from HPLC (Fig. 6B).

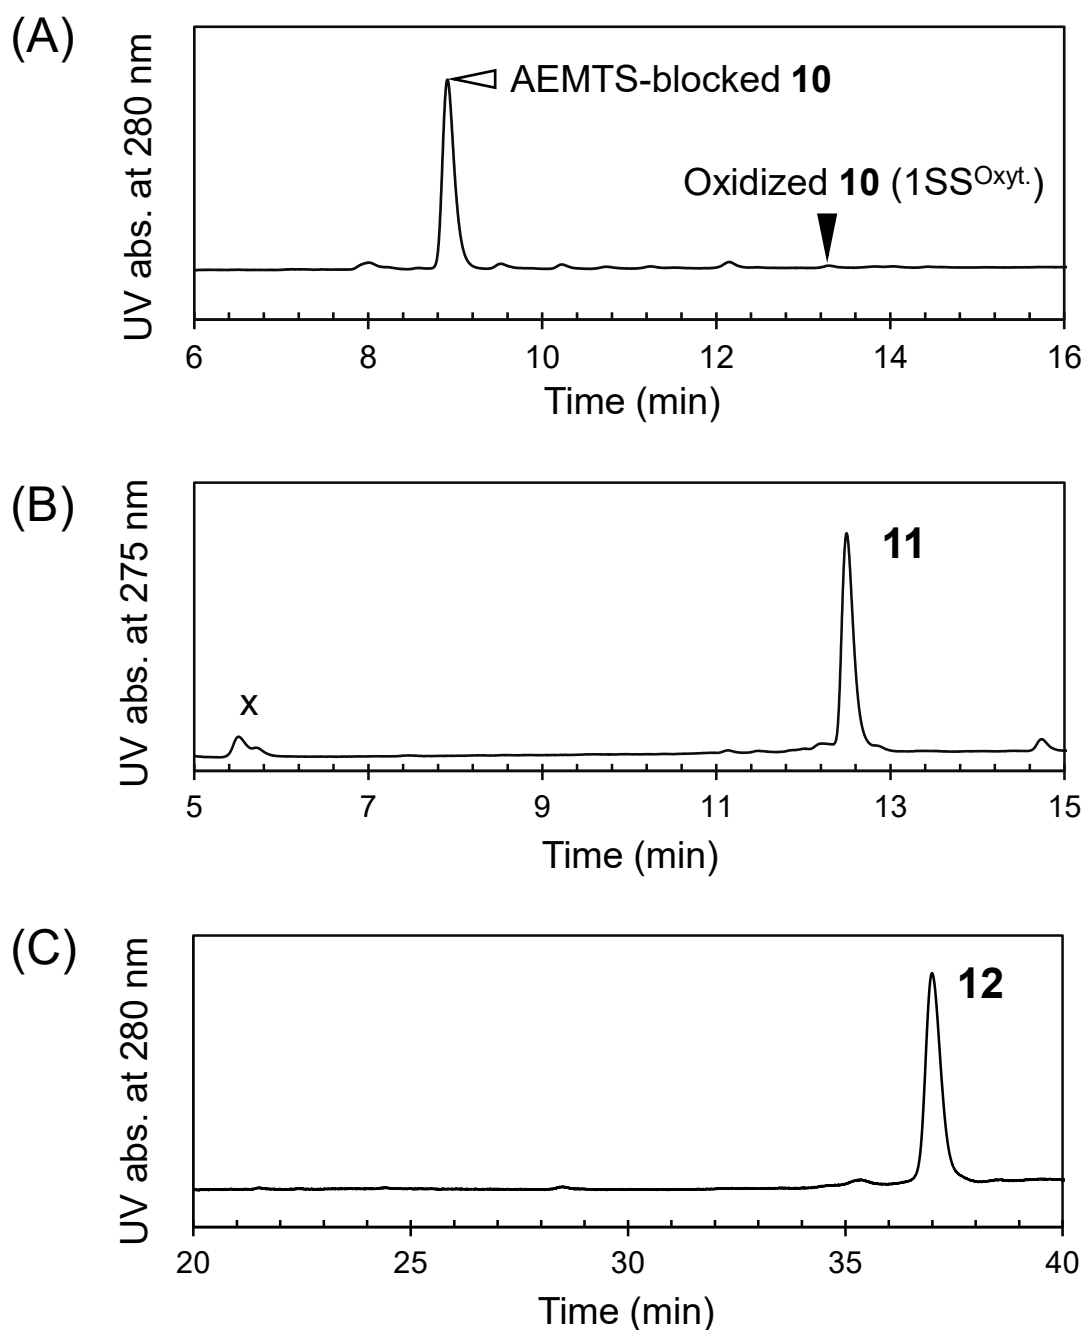

**Fig. S5** HPLC chromatograms obtained from SS-formation experiments of peptides **10** (A), **11** (B) and **12** (C) in the *absence* of **RSTe**. Reaction conditions: For (A), **10** (100 nmol),  $H_2O_2$  (200 nmol), and raw resin (210 nmol) were mixed in aqueous 0.1 % TFA solution (0.9 mL), and the sample was incubated with agitation at 27 °C for 2 h. For (B), **11** (80 nmol),  $H_2O_2$  (320 nmol), and raw resin (160 nmol) were mixed in aqueous 0.1 % TFA solution (1.0 mL), and the sample was incubated with agitation at 27 °C for 2 h. The symbol x represents byproducts resulting from undesired oxidation of side chains rather than SS-formation between Cys residues. For (C), **12** (80 nmol),  $H_2O_2$  (480 nmol), and raw resin (240 nmol) were mixed in aqueous 0.1 % TFA solution (1.0 mL), and the sample was incubated with agitation at 27 °C for 2 h.

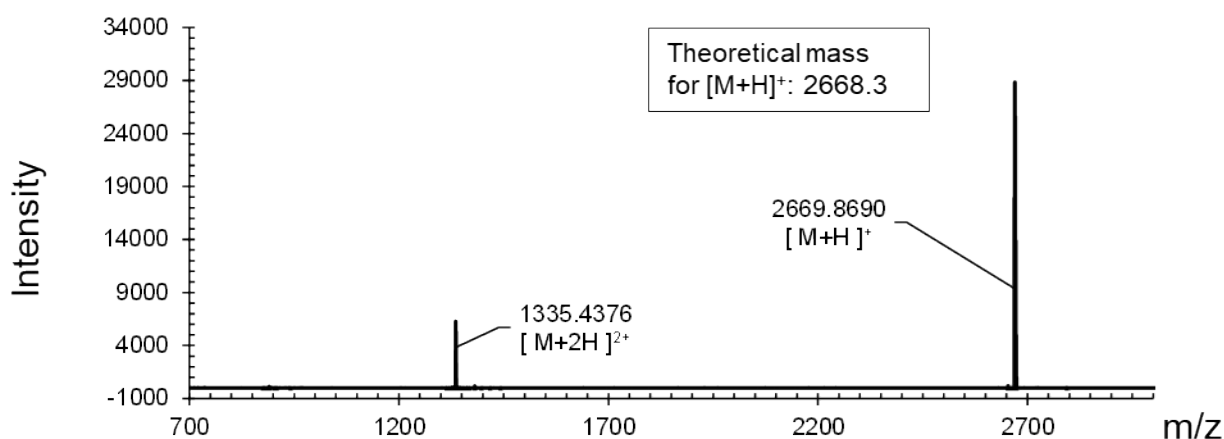

**Fig. S6** MALDI-TOF-MS chromatogram of fully oxidized **11** ( $2SS^{Rlx^A}$ ).  $2SS^{Rlx^A}$  was isolated from HPLC (Fig. 6D).

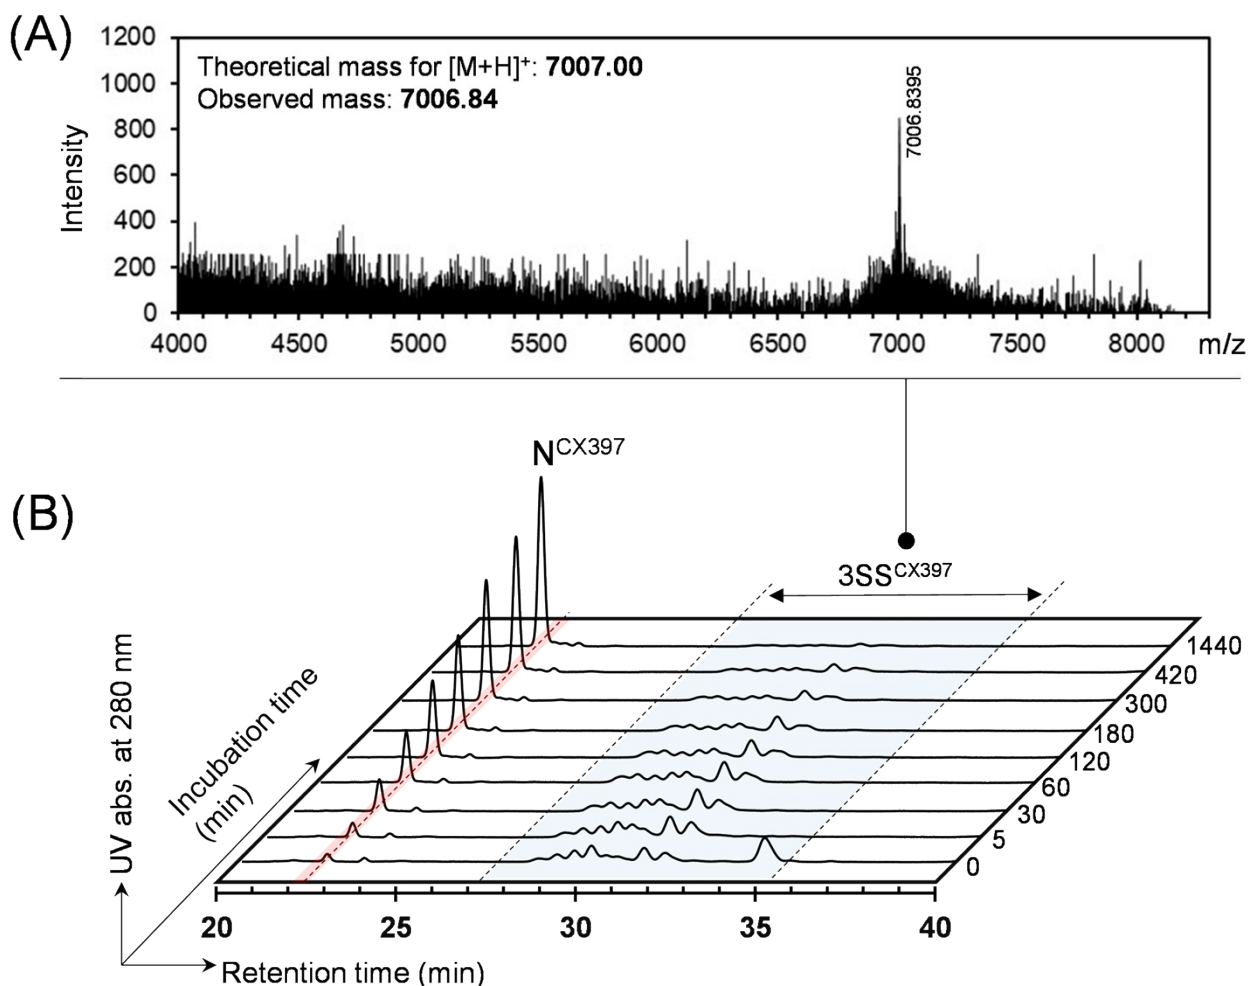

**Fig. S7** SS-isomerization experiment of  $3SS^{CX397}$  with GSH. (A) MALDI-TOF-MS chromatogram of fully oxidized **12** ( $3SS^{CX397}$ ).  $3SS^{CX397}$  was isolated from HPLC. (B) HPLC chromatograms of samples obtained from SS-isomerization experiment of  $3SS^{CX397}$ . Reaction conditions were  $[3SS^{CX397}]_0 = 80 \mu M$  and  $[GSH]_0 = 0.15 \text{ mM}$  in 100 mM Tris-HCl buffer solution containing 1 mM EDTA at pH 8.0 and 25 °C.

## References

- S1. K. Arai, K. Dedachi and M. Iwaoka, *Chem. Eur. J.*, **2011**, *17*, 481–485.
- S2. K. Arai, Y. Osaka, M. Haneda and Y. Sato, *Catal. Sci. Technol.*, **2019**, *9*, 3647–3655.
